# Supplementary material for: Fluorescent strip sensor for rapid and ultrasensitive determination of fluoroquinolones in fish and milk
Source: Royal Society of Chemistry journal article supplement (doi:10.1039/d2an01757a), 2022-12-15
Supplement: d2an01757a1.pdf [file d2an01757a1.pdf]

### Supporting information

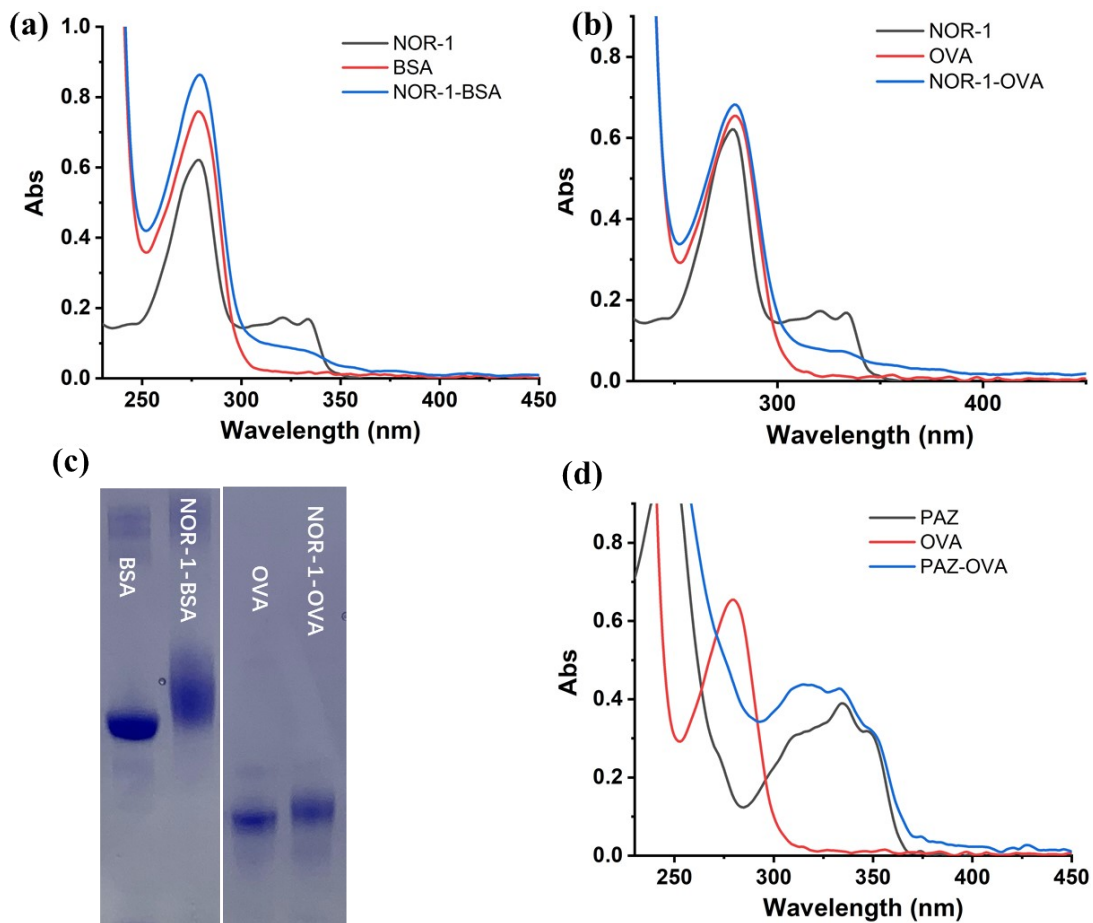

**Fig. S1** UV-Vis absorption spectrogram (a,b,d) and SDS-PAGE electrophoretogram (c) of antigens.

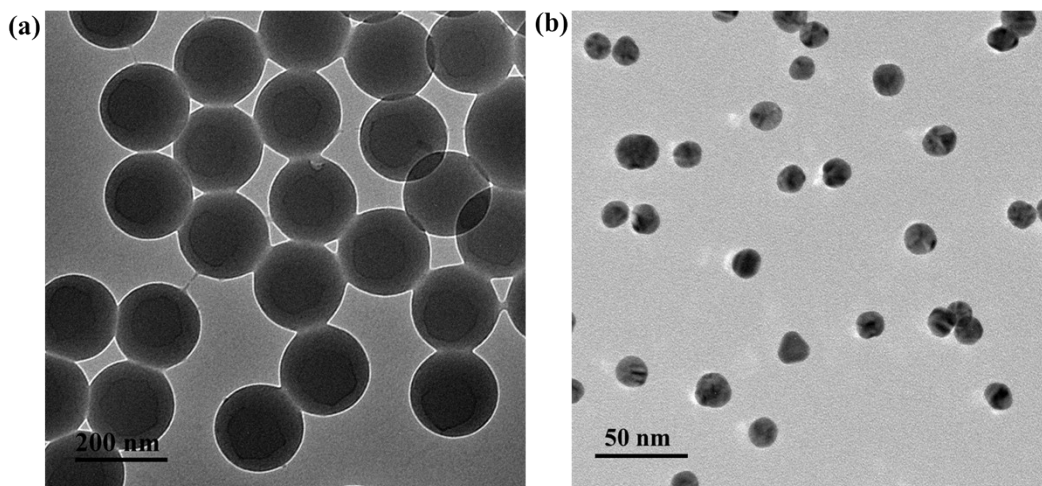

**Fig. S2** TEM images of Eu-fluorescence microspheres (a) and colloidal gold nanoparticles (b).

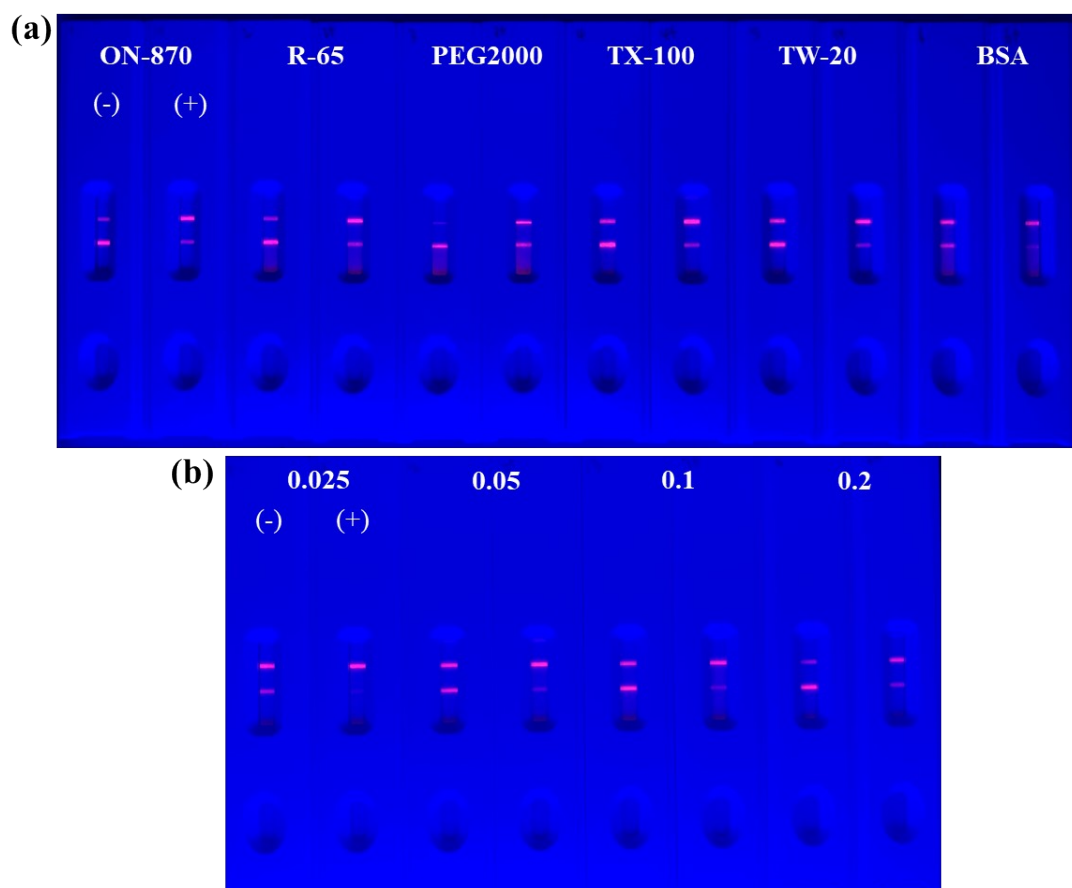

**Fig. S3** The effect of surfactant (a) and the concentration of coating antigen (b) on the performance of the EFM-based ICA. (-) norfloxacin: 0  $\mu\text{g}/\text{kg}$ ; (+) norfloxacin: 1  $\mu\text{g}/\text{kg}$ .

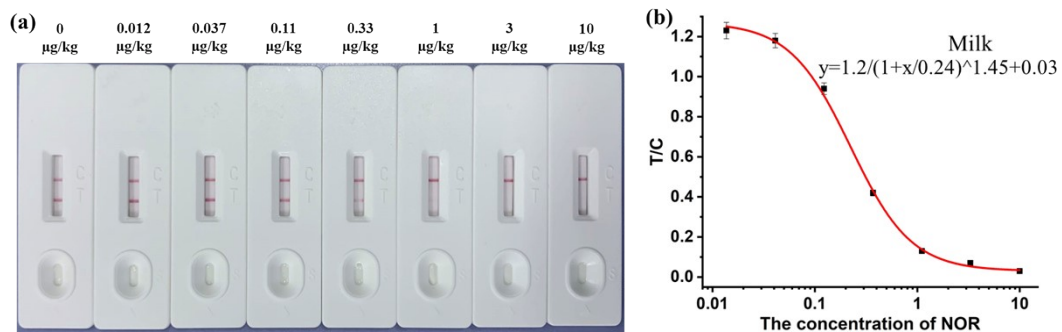

**Fig. S4** The test images (a) and calibration curves (b) of GNP-based LFIA for the determination of NOR in milk.

**Tab. S1** References of the immunoassays for the determination of norfloxacin and its analogues in fish and milk.

| Reference             | Year | Immunoassay                                                                                            | Sample                    | Sensitivity<br>(fluoroquinolone)                                                                                                                                                                                  | Time    |
|-----------------------|------|--------------------------------------------------------------------------------------------------------|---------------------------|-------------------------------------------------------------------------------------------------------------------------------------------------------------------------------------------------------------------|---------|
| (Xiao et al., 2022)   | 2022 | IC-elisa<br>Gold-labeled microwell immunochromatographic strip                                         | Aquatic products          | IC <sub>50</sub> (1c-elisa in standard solution):<br>1.4 ng/mL (norfloxacin)<br>1.3 ng/mL (pefloxacin)<br>2.1 ng/mL (ofloxacin)<br>1.5 ng/mL (lomefloxacin)<br>LOD (the strip in sample):<br>4 ng/mL (pefloxacin) | 10 min  |
| (Liu et al., 2021)    | 2021 | DC-CLIA/FIA                                                                                            | Milk                      | IC <sub>50</sub> (CLIA/ FIA):<br>0.345/1.206 ng/g (norfloxacin)                                                                                                                                                   | >4 h    |
| (Ren et al., 2021)    | 2021 | Black phosphorus-based immunochromatography                                                            | tap water and river water | LOD: 0.045 ng/mL (Norfloxacin)                                                                                                                                                                                    | 20 min  |
| (Han et al., 2021)    | 2021 | Chemiluminescence immunoassay                                                                          | Milk                      | LOD:<br>0.05 ng/mL (norfloxacin)<br>0.11 ng/mL (pefloxacin)<br>0.14 ng/mL (ciprofloxacin)<br>0.16 ng/mL (danofloxacin)                                                                                            | >1.5 h  |
| (Acaroz et al., 2020) | 2020 | Generic enzyme-immunoassay                                                                             | NULL                      | IC <sub>50</sub> : 0.05-73.2 ng/mL (32 FQs)                                                                                                                                                                       | >3 h    |
| (Hu et al., 2020)     | 2020 | Colloidal gold, quantum dots (QDs), and upconversion nanoparticles (UCNPs) immunochromatographic assay | Milk                      | Visual detection limit (norfloxacin):<br>20.0 µg/L (colloidal gold)<br>10.0 µg/L (QDs)<br>5.0 µg/L (UCNPs)                                                                                                        | 10 min  |
| (Liu et al., 2018)    | 2018 | Electrochemical immunosensor                                                                           | Standard solutions        | LOD: 0.3837 µg/L (norfloxacin)                                                                                                                                                                                    | >50 min |
| (Peng et al., 2017a)  | 2017 | Immunochromatographic strip (colloidal gold)                                                           | Milk                      | Cut-off value: 1 ng/mL (norfloxacin)<br>0.5-20 ng/mL (other nine FQs)                                                                                                                                             | 5 min   |
| (Peng et al., 2017b)  | 2017 | Gold nanoparticle-based paper sensor                                                                   | Milk                      | The cut-off values: 1-100 ng/mL (32 quinolones)<br>LOD: 0.1–10 ng/mL (32 quinolones)                                                                                                                              | 10 min  |
| (Hu et al., 2015)     | 2015 | Fluorescence immunoassay                                                                               | Milk                      | LOD: 0.01 ng/mL (norfloxacin)                                                                                                                                                                                     | >53 min |

**Tab. S2** The test result of ic-ELISA for 4D7 using several different coating antigens.

| NOR<br>( $\mu\text{g/L}$ ) | mAb<br>( $\mu\text{g/mL}$ ) | Coating antigen ( $\mu\text{g/mL}$ ) |       |         |       |         |       |         |       |         |       |         |       |
|----------------------------|-----------------------------|--------------------------------------|-------|---------|-------|---------|-------|---------|-------|---------|-------|---------|-------|
|                            |                             | Nor-1-OVA                            |       | NOR-OVA |       | GAT-OVA |       | SPA-OVA |       | MOX-OVA |       | PAZ-OVA |       |
|                            |                             | 0.09                                 | 0.03  | 0.09    | 0.03  | 0.09    | 0.03  | 0.09    | 0.03  | 0.09    | 0.03  | 0.09    | 0.03  |
| 0                          | 0.03                        | 3.122                                | 2.928 | 3.015   | 2.806 | 2.353   | 1.861 | 2.087   | 1.217 | 1.297   | 0.852 | 1.581   | 0.917 |
|                            | 0.01                        | 2.661                                | 2.283 | 2.547   | 2.083 | 1.514   | 1.161 | 1.073   | 0.55  | 0.566   | 0.378 | 0.757   | 0.338 |
| 0.05                       | 0.1                         | 3.14                                 | 2.904 | 2.949   | 2.655 | 1.665   | 1.285 | 0.887   | 0.469 | 0.591   | 0.383 | 0.418   | 0.252 |
|                            | 0.03                        | 2.397                                | 1.929 | 2.219   | 1.715 | 0.962   | 0.71  | 0.379   | 0.201 | 0.244   | 0.169 | 0.137   | 0.085 |
| Inhibition ratio           |                             | -1%                                  | 1%    | 2%      | 5%    | 29%     | 31%   | 57%     | 61%   | 54%     | 55%   | 74%     | 73%   |
|                            |                             | 10%                                  | 16%   | 13%     | 18%   | 36%     | 39%   | 65%     | 63%   | 57%     | 55%   | 82%     | 75%   |

**Tab. S3** The cross-reaction (CR) of 4D7 to fluoroquinolones.

| Chemicals     | IC <sub>50</sub> (ng/mL) | CR    | Chemicals     | IC <sub>50</sub> (ng/mL) | CR   |
|---------------|--------------------------|-------|---------------|--------------------------|------|
| Norfloxacin   | 0.027                    | 100%  | Sparfloxacin  | 1.5                      | 1.8% |
| Pefloxacin    | 0.056                    | 48.2% | Difloxacin    | 2.3                      | 1.2% |
| Enoxacin      | 0.06                     | 45%   | Sarafloxacin  | >5                       | <1%  |
| Lomefloxacin  | 0.062                    | 43.5% | Prulifloxacin | >5                       | <1%  |
| Ofloxacin     | 0.071                    | 38%   | Flumequine    | >5                       | <1%  |
| Danofloxacin  | 0.087                    | 31%   | Nadifloxacin  | >5                       | <1%  |
| Fleroxacin    | 0.1                      | 27%   | Moxifloxacin  | >5                       | <1%  |
| Enrofloxacin  | 0.11                     | 24.5% | Gatifloxacin  | >5                       | <1%  |
| Ciprofloxacin | 0.14                     | 19.3% | Balofloxacin  | >5                       | <1%  |
| Marbofloxacin | 0.25                     | 10.8% | Besifloxacin  | >5                       | <1%  |
| Pazufloxacin  | 0.62                     | 4.4%  | Orbifloxacin  | >5                       | <1%  |

## Reference:

- Acaroz, U., R. Dietrich, M. Knauer, and E. Märtlbauer. 2020. Development of a generic enzyme-immunoassay for the detection of fluoro (quinolone)-residues in foodstuffs based on a highly sensitive monoclonal antibody. *Food Anal. Method.* 13(3):780-792.
- Han, Z., T. Sun, Z. Xu, L. Fan, H. Yun, X. Ge, X. Liu, Y. Liu, and B. a. Ning. 2021. Detection of 4 quinolone antibiotics by chemiluminescence based on a novel Nor-Biotin bifunctional ligand and SA-ALP technology. *Biosci., Biotech., Bioch.* 85(7):1720-1728.
- Hu, G., S. Gao, X. Han, and L. Yang. 2020. Comparison of immunochromatographic strips using colloidal gold, quantum dots, and upconversion nanoparticles for visual detection of norfloxacin in milk samples. *Food Anal. Method.* 13(5):1069-1077.
- Hu, G., W. Sheng, Y. Zhang, X. Wu, and S. Wang. 2015. A novel and sensitive fluorescence immunoassay for the detection of fluoroquinolones in animal-derived foods using upconversion nanoparticles as labels. *Anal. bioanal. chem.* 407(28):8487-8496.
- Liu, B., M. Li, Y. Zhao, M. Pan, Y. Gu, W. Sheng, G. Fang, and S. Wang. 2018. A sensitive electrochemical immunosensor based on PAMAM dendrimer-encapsulated Au for detection of norfloxacin in animal-derived foods. *Sensors* 18(6):1946.
- Liu, X., Z. Xu, Z. Han, L. Fan, S. Liu, H. Yang, Z. Chen, T. Sun, and B. Ning. 2021. A highly sensitive and dual-readout immunoassay for norfloxacin in milk based on QDs-FM@ ALP-SA and click chemistry. *Talanta* 234:122703.
- Peng, J., L. Liu, H. Kuang, G. Cui, and C. Xu. 2017a. Development of an icELISA and immunochromatographic strip for detection of norfloxacin and its analogs in milk. *Food and Agr. Immunol.* 28(2):288-298.
- Peng, J., L. Liu, L. Xu, S. Song, H. Kuang, G. Cui, and C. Xu. 2017b. Gold nanoparticle-based paper sensor for ultrasensitive and multiple detection of 32 (fluoro) quinolones by one monoclonal antibody. *Nano Res.* 10(1):108-120.
- Ren, S., Q. Li, J. Wang, B. Fan, J. Bai, Y. Peng, S. Li, D. Han, J. Wu, and J. Wang. 2021. Development of a fast and ultrasensitive black phosphorus-based colorimetric/photothermal dual-readout immunochromatography for determination of norfloxacin in tap water and river water. *J. Hazard. Mater.* 402:123781.

Xiao, J., H. Yang, L. Qin, J. Liang, L. Li, X. Fan, and D. Peng. 2022. Rapid detection of fluoroquinolones residues in aquatic products based on a gold-labeled microwell immunochromatographic assay. *Food Qual. and Saf.*
